# Supplementary material
Source: publisher figshare collection journal article supplement (https://acs.figshare.com/ndownloader/files/4661572)

**Figure 1S.** Correlation of the experimental rate constants for proton transfer (solid diamonds) and deuteron transfer (solid triangles) with driving force in acetonitrile. Driving force is defined as  $-\Delta G$ . Solid line – fit of the Lee-Hynes model with  $V^\ddagger = 21.5$  kcal/mole,  $E_s = 7.0$  kcal/mole,  $\omega_Q = 199.5$   $\text{cm}^{-1}$ , reactant stretch =  $2645$   $\text{cm}^{-1}$ , and product bend  $768$   $\text{cm}^{-1}$ .

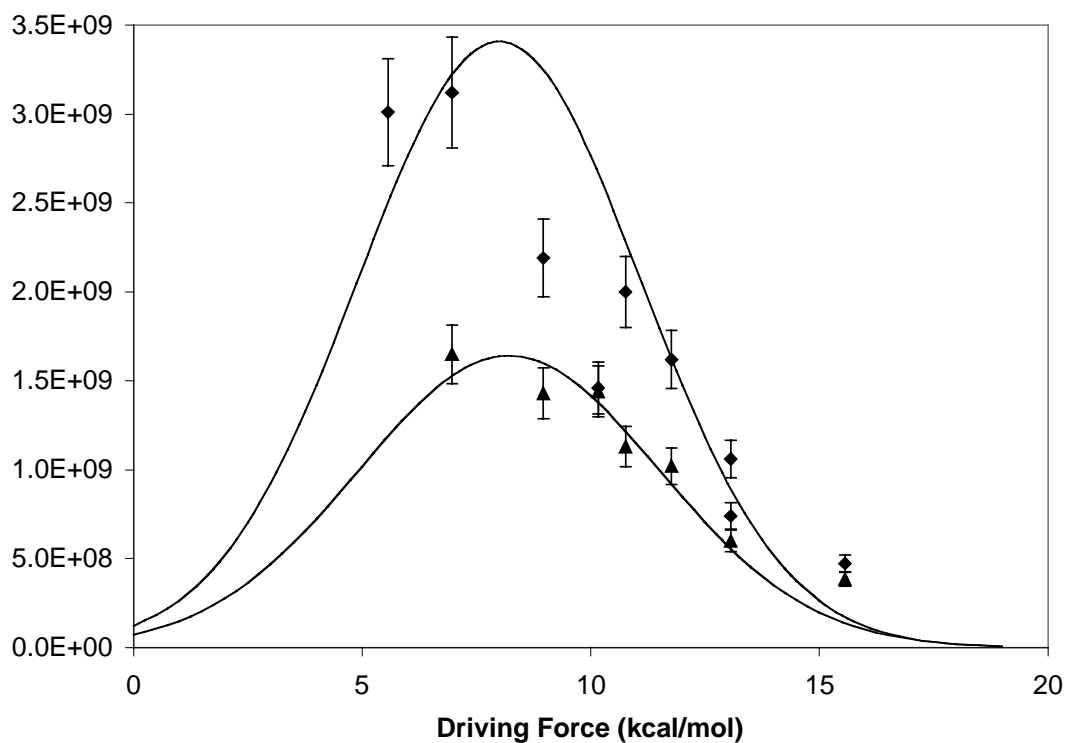

**Figure 2S.** Correlation of the experimental rate constants for proton transfer (solid diamonds) and deuteron transfer (solid triangles) with driving force in acetonitrile. Driving force is defined as  $-\Delta G$ . Solid line – fit of the Lee-Hynes model with  $V^\ddagger = 22.6$  kcal/mole,  $E_s = 6.5$  kcal/mole,  $\omega_Q = 193.0$   $\text{cm}^{-1}$ , reactant bend =  $1183$   $\text{cm}^{-1}$ , and product stretch  $2386$   $\text{cm}^{-1}$ .

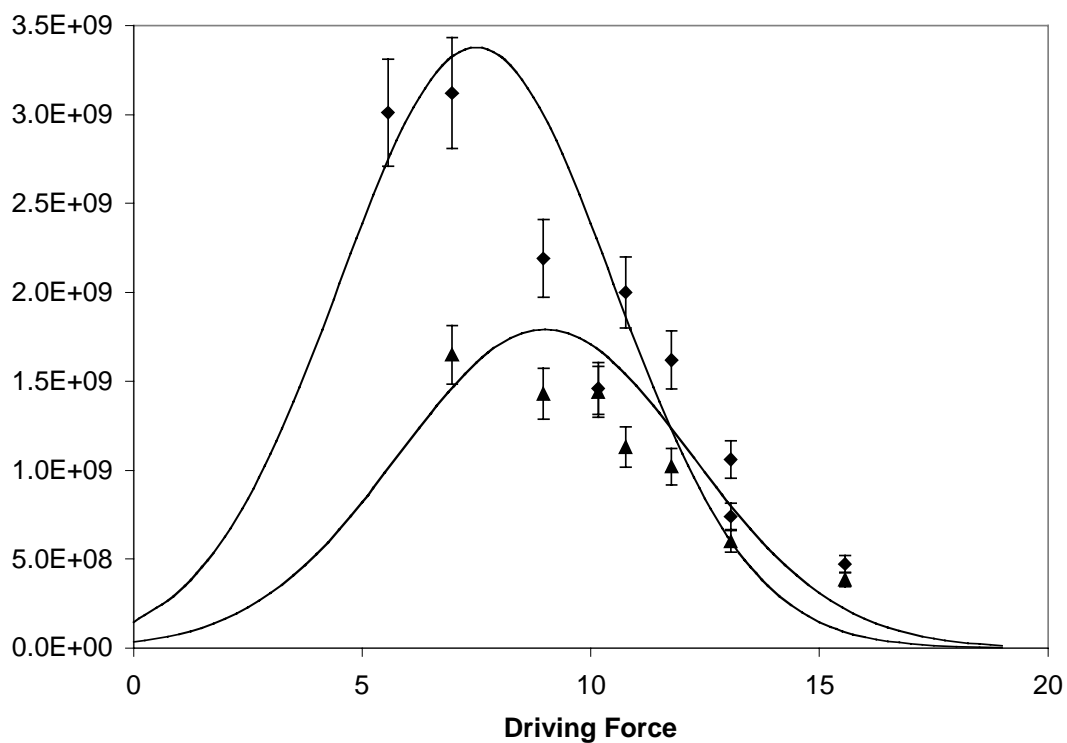

**Figure 3S.** Correlation of the experimental rate constants for proton transfer (solid diamonds) and deuteron transfer (solid triangles) with driving force in DMF. Driving force is defined as  $-\Delta G$ . Solid line – fit of the Lee-Hynes model with  $V^\ddagger = 26.7$  kcal/mole,  $E_s = 7.3$  kcal/mole,  $\omega_Q = 174.0$   $\text{cm}^{-1}$ , reactant stretch =  $2645$   $\text{cm}^{-1}$ , and product stretch  $2386$   $\text{cm}^{-1}$ .

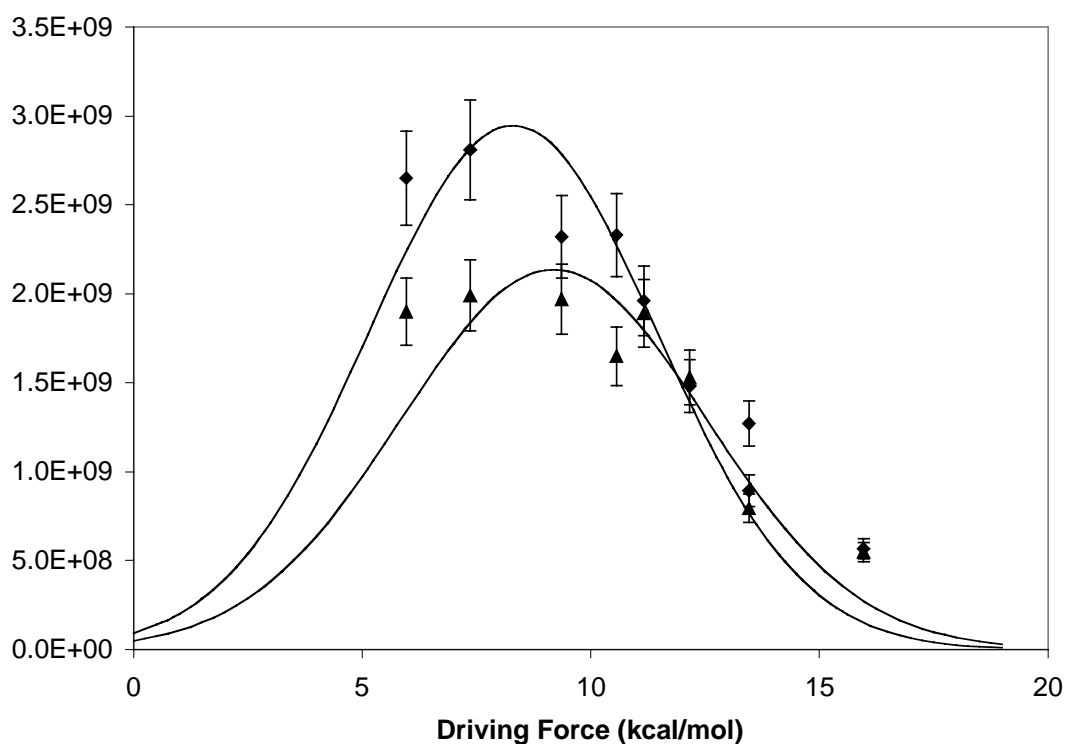

**Figure 4S.** Correlation of the experimental rate constants for proton transfer (solid diamonds) and deuteron transfer (solid triangles) with driving force in DMF. Driving force is defined as  $-\Delta G$ . Solid line – fit of the Lee-Hynes model with  $V^\ddagger = 22.3$  kcal/mole,  $E_s = 7.4$  kcal/mole,  $\omega_Q = 191.3$   $\text{cm}^{-1}$ , reactant stretch =  $2645$   $\text{cm}^{-1}$ , and product bend  $768$   $\text{cm}^{-1}$ .

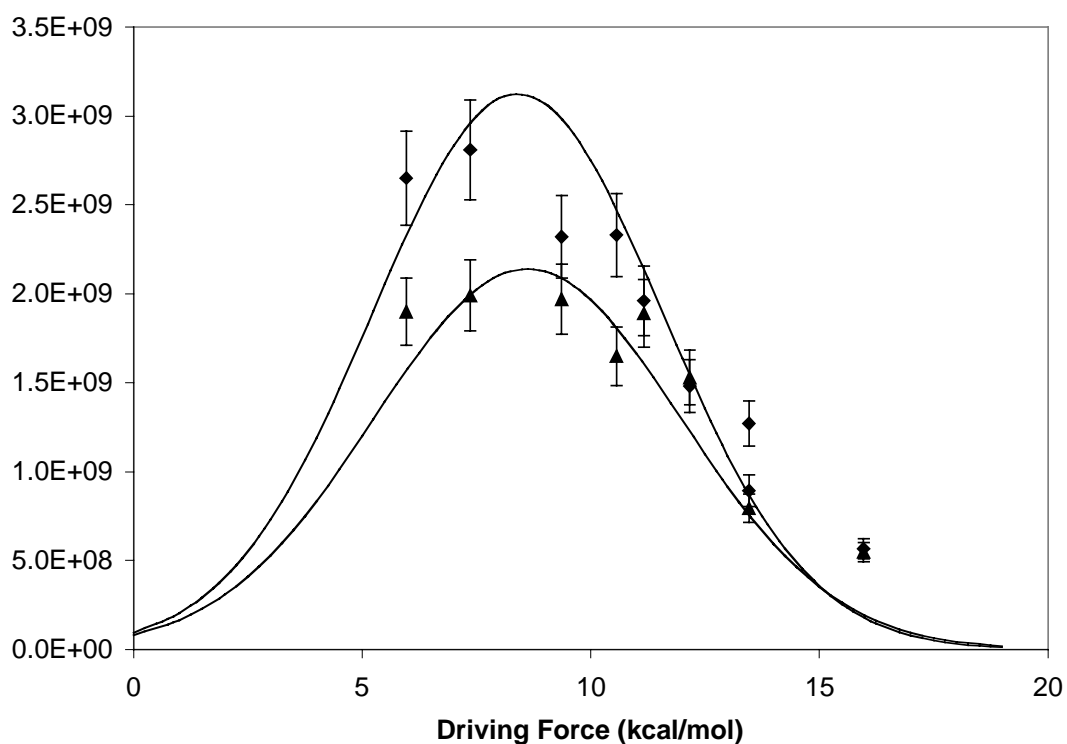

**Figure 5S.** Correlation of the experimental rate constants for proton transfer (solid diamonds) and deuteron transfer (solid triangles) with driving force in DMF. Driving force is defined as  $-\Delta G$ . Solid line – fit of the Lee-Hynes model with  $V^\ddagger = 23.5$  kcal/mole,  $E_s = 7.3$  kcal/mole,  $\omega_Q = 185.5$   $\text{cm}^{-1}$ , reactant bend =  $1183$   $\text{cm}^{-1}$ , and product stretch  $2386$   $\text{cm}^{-1}$ .

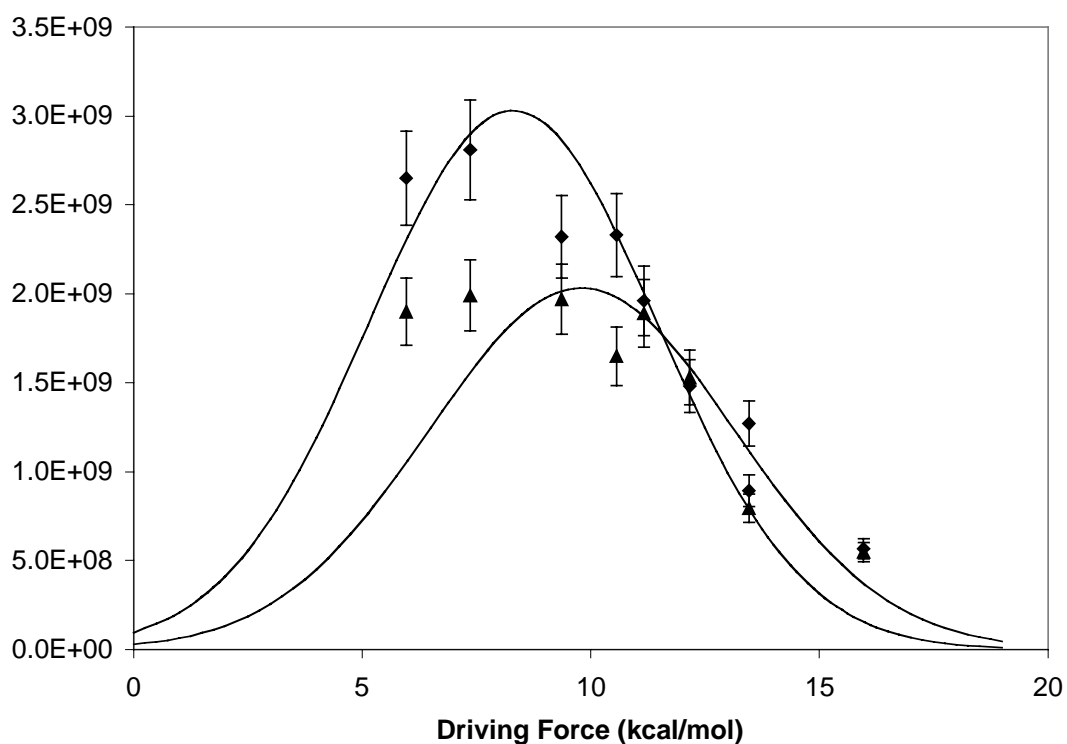

**Figure 6S.** Correlation of the experimental rate constants for proton transfer (solid diamonds) and deuteron transfer (solid triangles) with driving force in DMF. Driving force is defined as  $-\Delta G$ . Solid line – fit of the Lee-Hynes model with  $V^\ddagger = 19.0$  kcal/mole,  $E_s = 7.3$  kcal/mole,  $\omega_Q = 207.8$   $\text{cm}^{-1}$ , reactant bend =  $1183$   $\text{cm}^{-1}$ , and product bend  $768$   $\text{cm}^{-1}$ .

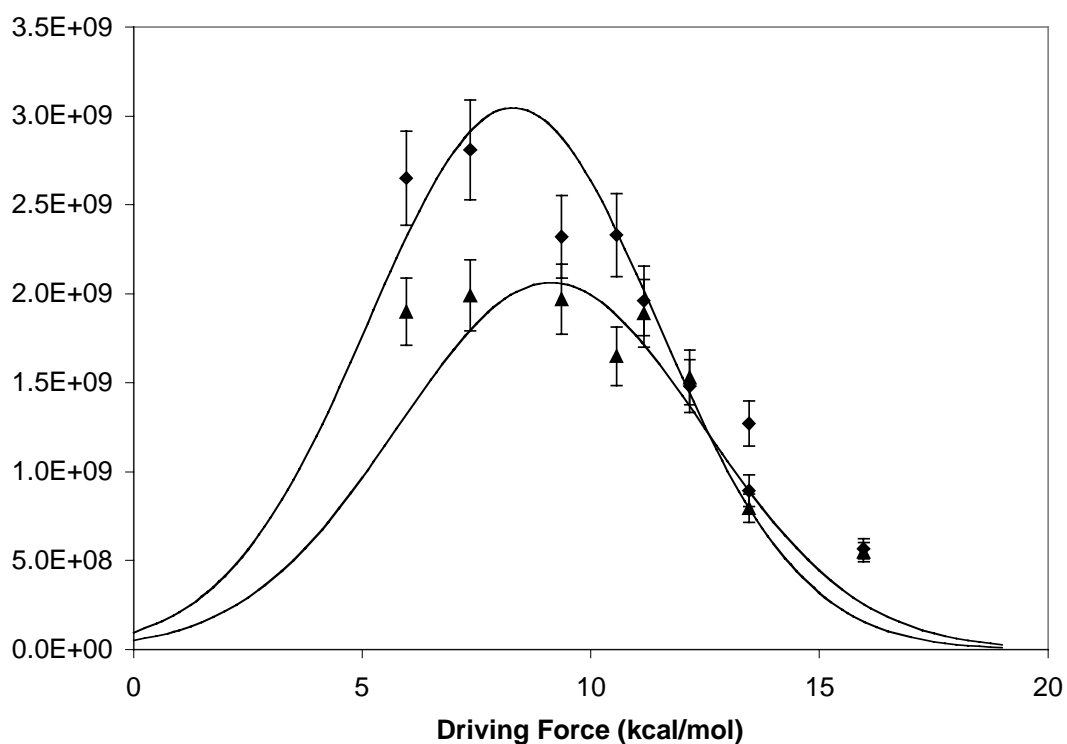

**Figure 7S.** Correlation of the experimental rate constants for proton transfer (solid diamonds) and deuteron transfer (solid triangles) with driving force in acetonitrile. Driving force is defined as  $-\Delta G$ . Solid line – fit of the Lee-Hynes model with  $V^\ddagger = 18.5$  kcal/mole,  $E_s = 6.1$  kcal/mole,  $\omega_Q = 215.1$   $\text{cm}^{-1}$ , reactant bend =  $1183$   $\text{cm}^{-1}$ , and product bend  $768$   $\text{cm}^{-1}$ .  $\Delta Q = 0.01 \text{ \AA}$

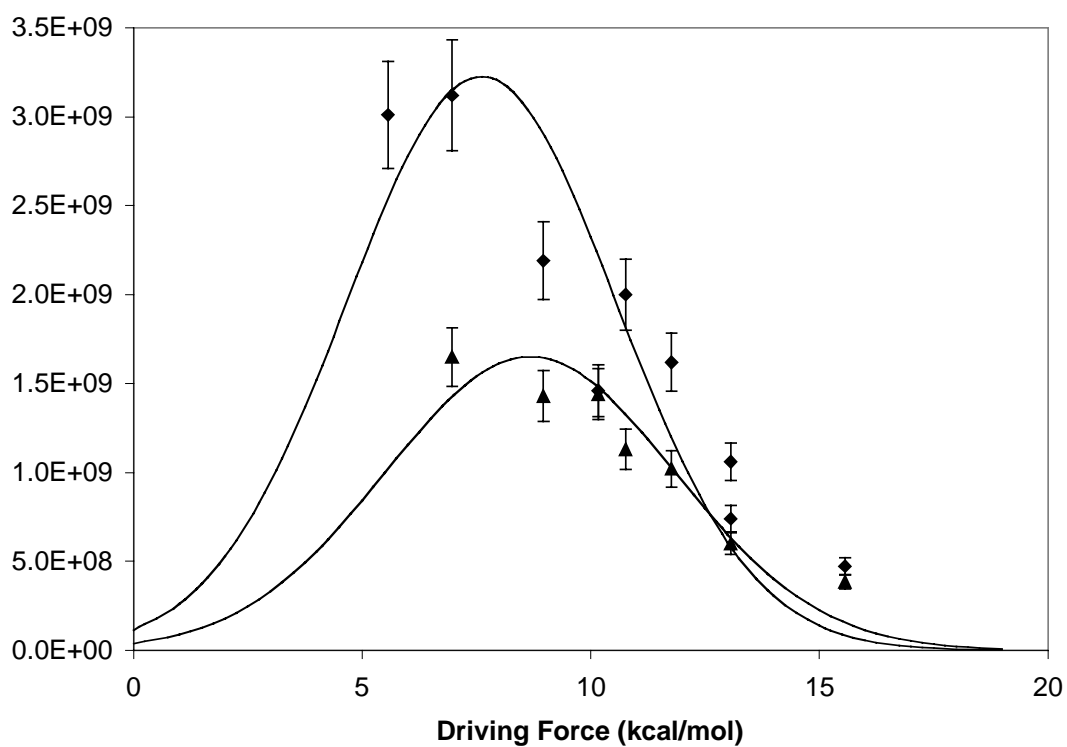

**Figure 8S.** Correlation of the experimental rate constants for proton transfer (solid diamonds) and deuteron transfer (solid triangles) with driving force in acetonitrile. Driving force is defined as  $-\Delta G$ . Solid line – fit of the Lee-Hynes model with  $V^\ddagger = 18.7$  kcal/mole,  $E_s = 3.0$  kcal/mole,  $\omega_Q = 215.0$   $\text{cm}^{-1}$ , reactant bend =  $1183$   $\text{cm}^{-1}$ , and product bend  $768$   $\text{cm}^{-1}$ .  $\Delta Q = 0.05 \text{ \AA}$

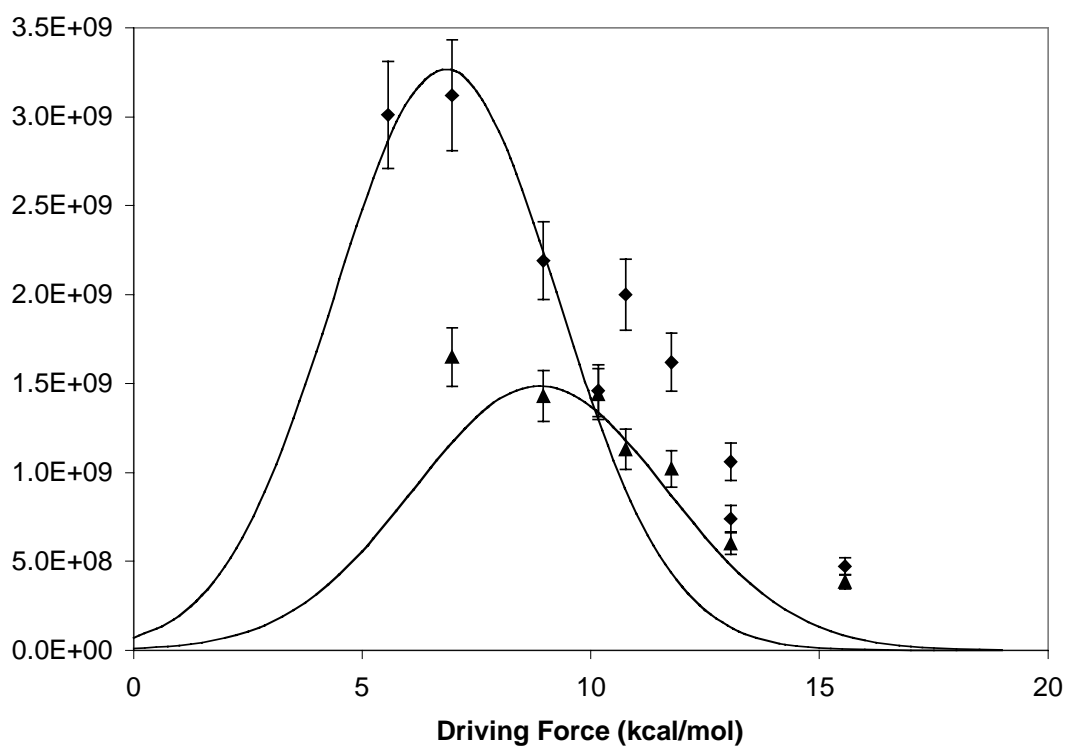

Supplement: Supplementary file 1 [file 4661572]
